# Supplementary material for: Cathepsin K Deficiency Prevents the Aggravated Vascular Remodeling Response to Flow Cessation in ApoE-/- Mice
Source: PubMed Central journal article supplement (PMC5026377; doi:10.1371/journal.pone.0162595), 2016-09-16

S1 Fig.

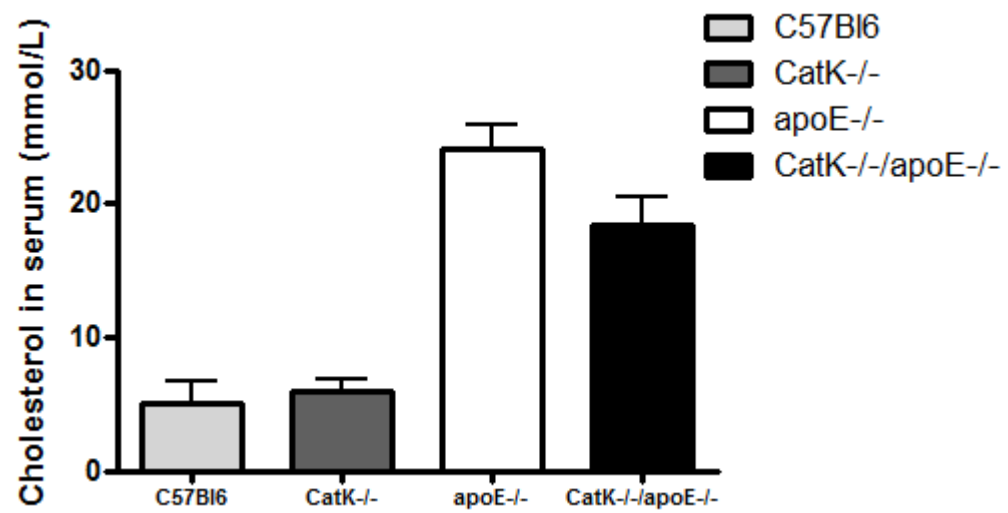

Supplement: pone.0162595.s001.pdf [file pone.0162595.s001.pdf]
