# Supplementary material for: Cathepsin K Deficiency Prevents the Aggravated Vascular Remodeling Response to Flow Cessation in ApoE-/- Mice
Source: PubMed Central journal article supplement (PMC5026377; doi:10.1371/journal.pone.0162595), 2016-09-16
Supplement: pone.0162595.s003.pdf [file pone.0162595.s003.pdf]

**S1 Table**

|                    | Forward primer (5'-3')   | Reverse primer (5'-3') |
|--------------------|--------------------------|------------------------|
| <b>Arginase-1</b>  | ATGGAAGAGACCTTCAGCTAC    | GCTGTCTTCCCAAGAGTTGGG  |
| <b>MR</b>          | GCAAATGGAGCCGTCTGTGC     | CTCGTGGATCTCCGTGACAC   |
| <b>IL-10</b>       | TCTTACTGACTGGCATGAGGATCA | GTCCGCAGCTCTAGGAGCAT   |
| <b>Nos2</b>        | CAGCTGGGCTGTACAAACCTT    | CATTGCAAGTGAAGCGTTTCG  |
| <b>IL-18</b>       | ACAACTTTGGCCGACTTCAC     | GGGTTCACTGGCACTTTGAT   |
| <b>cyclophilin</b> | CAAATGCTGGACCAAACACAA    | TTCACCTTCCCAAAGACCACAT |
